# Supplementary material for: Motor performance of children with attention deficit hyperactivity disorder: focus on the Bruininks-Oseretsky Test of Motor Proficiency
Source: PubMed Central journal article supplement — Clin Exp Pediatr. 2022 Feb 17;65(11):512–20. doi: 10.3345/cep.2021.00962 (PMC9650357; doi:10.3345/cep.2021.00962), 2022-02-17
Supplement: cep-2021-00962-suppl.pdf [file cep-2021-00962-suppl.pdf]

**Supplementary Table 1. Search strategy and studies retrieved**

| Database | Search strategy used                                                                                                                                                                             | Studies retrieved |
|----------|--------------------------------------------------------------------------------------------------------------------------------------------------------------------------------------------------|-------------------|
| PubMed   | ((bruininks-oseretsky test of motor proficiency OR BOTMP bruininks-oseretsky test of motor proficiency second edition OR BOT-2)) AND (attention deficit hyperactive disorder OR ADD OR AD OR HD) | 42                |
| Cochrane | Bruininks-Oseretsky Test of Motor Proficiency OR BOTMP OR Bruininks-Oseretsky Test of Motor Proficiency second edition OR BOT-2 AND Attention deficit hyperactive disorder OR ADD OR AD OR HD    | 11                |
| OVID     | (Bruininks-Oseretsky Test of Motor Proficiency AND ADHD)                                                                                                                                         | 56                |
| PEDro    | Bruininks-Oseretsky Test of Motor Proficiency AND ADHD                                                                                                                                           | 0                 |

BOTMP, Bruininks-Oseretsky Test of Motor Proficiency; BOT-2, Bruininks-Oseretsky Test of Motor Proficiency Second Edition; ADHD, attention deficit hyperactivity disorder; ADD, attention deficit disorder; AD, attention disorder; HD, hyperactive disorder.
